# Supplementary material
Source: PubMed Central journal article supplement (PMC5860375)

SUPPLEMENTARY DATA

**Protein biomarkers for insulin resistance and type 2 diabetes risk in two large community cohorts**  
Nowak *et al.*

SUPPLEMENTARY DATA

**Supplementary Table 1. Insulin resistance genetic risk score components and association with lnHOMA-IR**

| SNP        | Gene                  | Chromosome | Position (Genome Reference Consortium Human Build 38) | IR increasing allele | other allele | SNP score - lnHOMA-IR association in MAGIC*             |
|------------|-----------------------|------------|-------------------------------------------------------|----------------------|--------------|---------------------------------------------------------|
| rs4846565  | <i>LYPLALI</i>        | 1          | 219548762                                             | G                    | A            | $\beta = 0.012 \pm 0.001$ ,<br>F=71.619, P =<br>2.6E-17 |
| rs10195252 | <i>GRB14</i>          | 2          | 164656581                                             | T                    | C            |                                                         |
| rs2943645  | <i>IRS1</i>           | 2          | 226234464                                             | T                    | C            |                                                         |
| rs17036328 | <i>PPARG</i>          | 3          | 12348985                                              | T                    | C            |                                                         |
| rs3822072  | <i>FAM13A1</i>        | 4          | 88820118                                              | A                    | G            |                                                         |
| rs6822892  | <i>PDGFC</i>          | 4          | 156813523                                             | A                    | G            |                                                         |
| rs4865796  | <i>ARL15</i>          | 5          | 53976834                                              | A                    | G            |                                                         |
| rs459193   | <i>ANKRD55/MAP3K1</i> | 5          | 56510924                                              | G                    | A            |                                                         |
| rs2745353  | <i>RSPO3</i>          | 6          | 127131790                                             | T                    | C            |                                                         |
| rs731839   | <i>PEPD</i>           | 19         | 33408159                                              | G                    | A            |                                                         |

F - F-statistic associated with the regression coefficient, IR - insulin resistance, P - P-value, SNP - single nucleotide polymorphism  $\beta \pm SE$  indicates the per-allele effect on lnHOMA-IR \*SNP effects based on data from PMID 20081858

SUPPLEMENTARY DATA

**Supplementary Table 2. Instrumental variable analysis for insulin resistance causally affecting biomarkers**

| <b>Biomarker</b>   | <b>Association of IR genetic risk score with biomarker in PIVUS/ULSAM*</b> |                | <b>IV estimator***</b>           |                |
|--------------------|----------------------------------------------------------------------------|----------------|----------------------------------|----------------|
|                    | <b><math>\beta \pm SE^{**}</math></b>                                      | <b>P-value</b> | <b><math>\beta \pm SE</math></b> | <b>P-value</b> |
| <b>Leptin</b>      | -0.017 $\pm$ 0.012                                                         | 0.174          | -1.450 $\pm$ 1.081               | 0.180          |
| <b>t-PA</b>        | 0.037 $\pm$ 0.014                                                          | 0.008          | 3.207 $\pm$ 1.271                | 0.012          |
| <b>Renin</b>       | 0.005 $\pm$ 0.014                                                          | 0.687          | 0.473 $\pm$ 1.174                | 0.687          |
| <b>IL-1ra</b>      | -0.025 $\pm$ 0.014                                                         | 0.079          | -2.141 $\pm$ 1.245               | 0.085          |
| <b>HGF</b>         | 0.010 $\pm$ 0.014                                                          | 0.482          | 0.852 $\pm$ 1.216                | 0.483          |
| <b>Cathepsin D</b> | 0.011 $\pm$ 0.014                                                          | 0.410          | 0.991 $\pm$ 1.207                | 0.412          |
| <b>FABP-4</b>      | -0.015 $\pm$ 0.013                                                         | 0.243          | -1.308 $\pm$ 1.130               | 0.247          |

FABP-4 - fatty acid binding protein 4, HGF - hepatocyte growth factor, IL-1ra - interleukin-1 receptor antagonist, t-PA - tissue plasminogen activator\*all 10 IR-risk SNPs were directly genotyped with the Illumina Cardio-MetaboChip array in PIVUS and ULSAM \*\* $\beta \pm SE$  indicates the per-allele effect on normalized protein expression value of biomarker (SD-unit) \*\*\* $\beta \pm SE$  indicates the causal effect of one unit change in lnHOMA-IR on normalized protein expression value of biomarker (SD-unit)

SUPPLEMENTARY DATA

**Supplementary Table 3. Instrumental variable analysis for biomarkers causally affecting insulin resistance**

| Biomarker                   | Genetic instrumental variable |                       |           |              |               |               | SNP - Biomarker association |               |                | SNP - lnHOMA-IR association |                | IV estimator         |                |       |
|-----------------------------|-------------------------------|-----------------------|-----------|--------------|---------------|---------------|-----------------------------|---------------|----------------|-----------------------------|----------------|----------------------|----------------|-------|
|                             | SNP                           | chr                   | pos       | Closest gene | EA            | other allele  | $\beta \pm SE^*$            | P-value       | r <sup>2</sup> | $\beta \pm SE^{**}$         | P-value        | $\beta \pm SE^{***}$ | P-value        |       |
| Published GWAS <sup>†</sup> | IL-1ra                        | rs4251961             | 2         | 113116890    | <i>IL-1RN</i> | T             | C                           | 0.082 ± 0.009 | 2.8E-21        | NR                          | 0.001 ± 0.004  | 0.818                | 0.012 ± 0.051  | 0.812 |
|                             |                               | rs6759676             | 2         | 113078771    | <i>IL1F10</i> | C             | T                           | 0.075 ± 0.009 | 1.7E-17        | NR                          | 0.002 ± 0.004  | 0.658                | 0.024 ± 0.053  | 0.653 |
|                             |                               | Combined score        |           |              |               |               |                             | 0.079 ± 0.006 | 5.9E-35        | 2.0%                        | 0.001 ± 0.003  | 0.624                | 0.018 ± 0.037  | 0.624 |
|                             | HGF                           | rs5745687             | 7         | 81729735     | <i>HGF</i>    | C             | T                           | 0.099 ± 0.011 | 3.6E-19        | 2.1%                        | 0.016 ± 0.008  | 0.062                | 0.162 ± 0.083  | 0.051 |
|                             | t-PA                          | rs9399599             | 6         | 147382163    | <i>STXBP5</i> | T             | A                           | 0.032 ± 0.004 | 2.9E-14        | 0.3%                        | 0.001 ± 0.004  | 0.821                | 0.028 ± 0.125  | 0.822 |
|                             |                               | rs3136739             | 8         | 42347562     | <i>POLB</i>   | A             | G                           | 0.063 ± 0.010 | 1.3E-09        | 0.2%                        | 0.003 ± 0.012  | 0.801                | 0.046 ± 0.191  | 0.809 |
| rs7301826                   |                               | 12                    | 130806556 | <i>STX2</i>  | C             | T             | 0.027 ± 0.004               | 1.0E-09       | 0.3%           | 0.002 ± 0.004               | 0.694          | 0.059 ± 0.152        | 0.697          |       |
| Combined score              |                               |                       |           |              |               | 0.032 ± 0.003 | 7.0E-32                     | 0.8%          | 0.001 ± 0.003  | 0.633                       | 0.042 ± 0.087  | 0.633                |                |       |
| PIVUS/ULS AM GWAS           | Cathepsin D                   | rs17571 <sup>¶¶</sup> | 11        | 1761364      | <i>CTSD</i>   | G             | A                           | 0.708 ± 0.059 | 9.49E-33       | 7.0%                        | -0.006 ± 0.008 | 0.426                | -0.009 ± 0.011 | 0.425 |

GWAS - genome wide association study, HGF - hepatocyte growth factor, IL-1ra - interleukin-1 receptor antagonist, NR - not reported, t-PA - tissue plasminogen activator, chr - chromosome, pos - position (Genome Reference Consortium Human Build 38), EA - effect-allele (biomarker-increasing allele), r<sup>2</sup> - variance explained. <sup>†</sup>References: IL-1ra - PMID 24969107, HGF - PMID 25552591, t-PA - PMID 24578379. <sup>¶¶</sup>proxy-SNP (r<sup>2</sup> > 0.8) for rs55861089 (position 1783757, chromosome 11, effect/non-effect alleles A/g). \* $\beta \pm SE$  indicates the per-allele effect on protein concentration (ln-transformed for HGF and t-PA, log<sub>2</sub>-scaled normalized protein expression value for cathepsin D) \*\* $\beta \pm SE$  indicates the per-allele effect on ln-transformed HOMA-IR \*\*\* $\beta \pm SE$  indicates the causal effect of one unit change in biomarker (ln-transformed for HGF and t-PA, SD-unit for cathepsin D) on lnHOMA-IR

SUPPLEMENTARY DATA

**Supplementary Figure 1.** Hypothetical causal diagram of the relationship of protein biomarkers and insulin resistance.

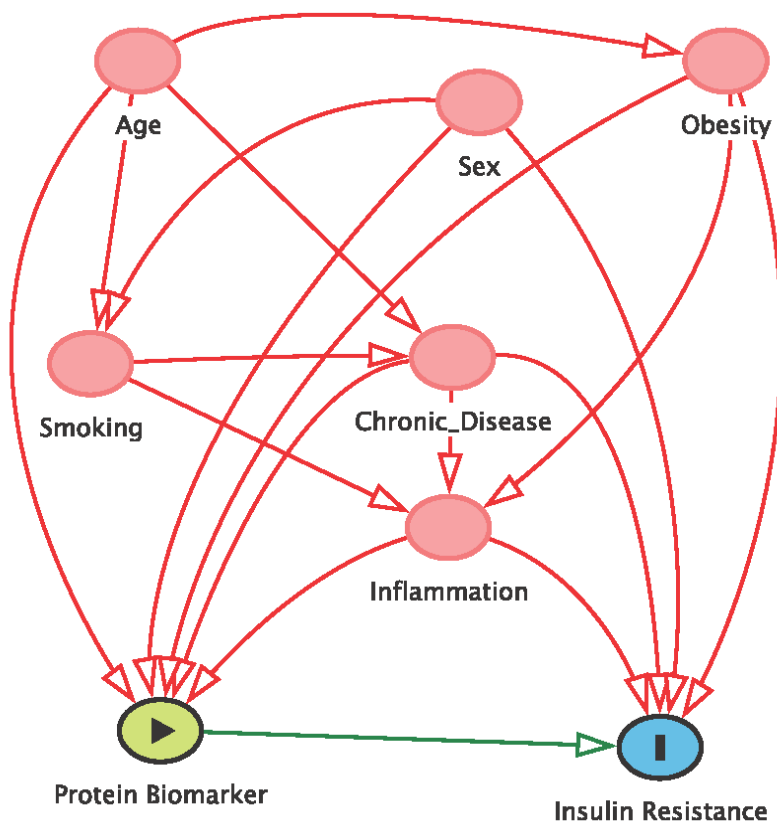

SUPPLEMENTARY DATA

**Supplementary Figure 2. Forest plot to explore potential pleiotropy of the genetic IR score to test the effect of IR on t-PA levels.** Insulin resistance-increasing allele counts for each SNP in ULSAM and PIVUS were extracted. Following cohort-, age-, and sex-adjusted meta-analysis, heterogeneity in MR analysis findings based on the individual ten SNPs was assessed by plotting the respective IV estimators and 95% CI. The Forest plot indicates a lack of significant heterogeneity, which makes a violation of the pleiotropy assumption less likely as an explanation of our positive results.

**Sensitivity analysis: Insulin Resistance genetic risk score  
Component SNP beta coefficient for causal effect on t-PA**

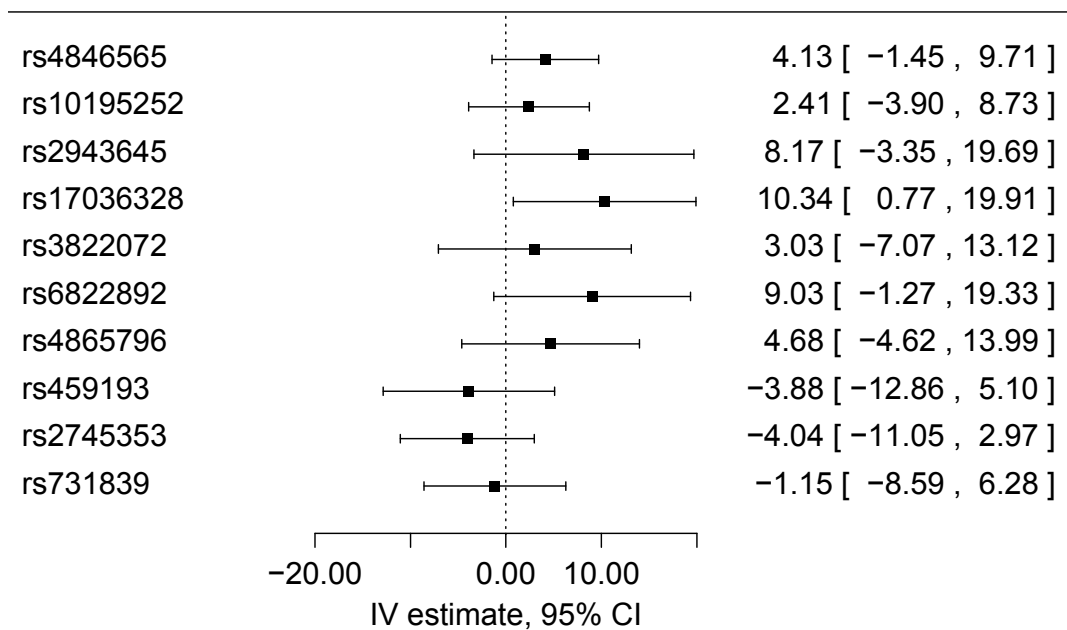

Supplement: DB150881SupplementaryData.pdf [file DB150881SupplementaryData.pdf]
